# Supplementary material for: IL-4 driven transcription factor FoxQ1 is expressed by monocytes in atopic dermatitis and stimulates monocyte migration
Source: PubMed Central journal article supplement (PMC5715145; doi:10.1038/s41598-017-17307-z), 2017-12-04
Supplement: 41598_2017_17307_MOESM1_ESM.pdf [file 41598_2017_17307_MOESM1_ESM.pdf]

**Manuscript title: IL-4 driven transcription factor FoxQ1 is expressed by monocytes in atopic dermatitis and stimulates monocyte migration**

Authors: Ilja Ovsy, Vladimir Riabov, Ioannis Manousaridis, Julia Michel, Kondaiah Moganti, Shuiping Yin, Tengfei Liu, Carsten Sticht, Elisabeth Kremmer, Martin C. Harmsen, Sergij Goerd, Alexei Gratchev, and Julia Kzhyshkowska

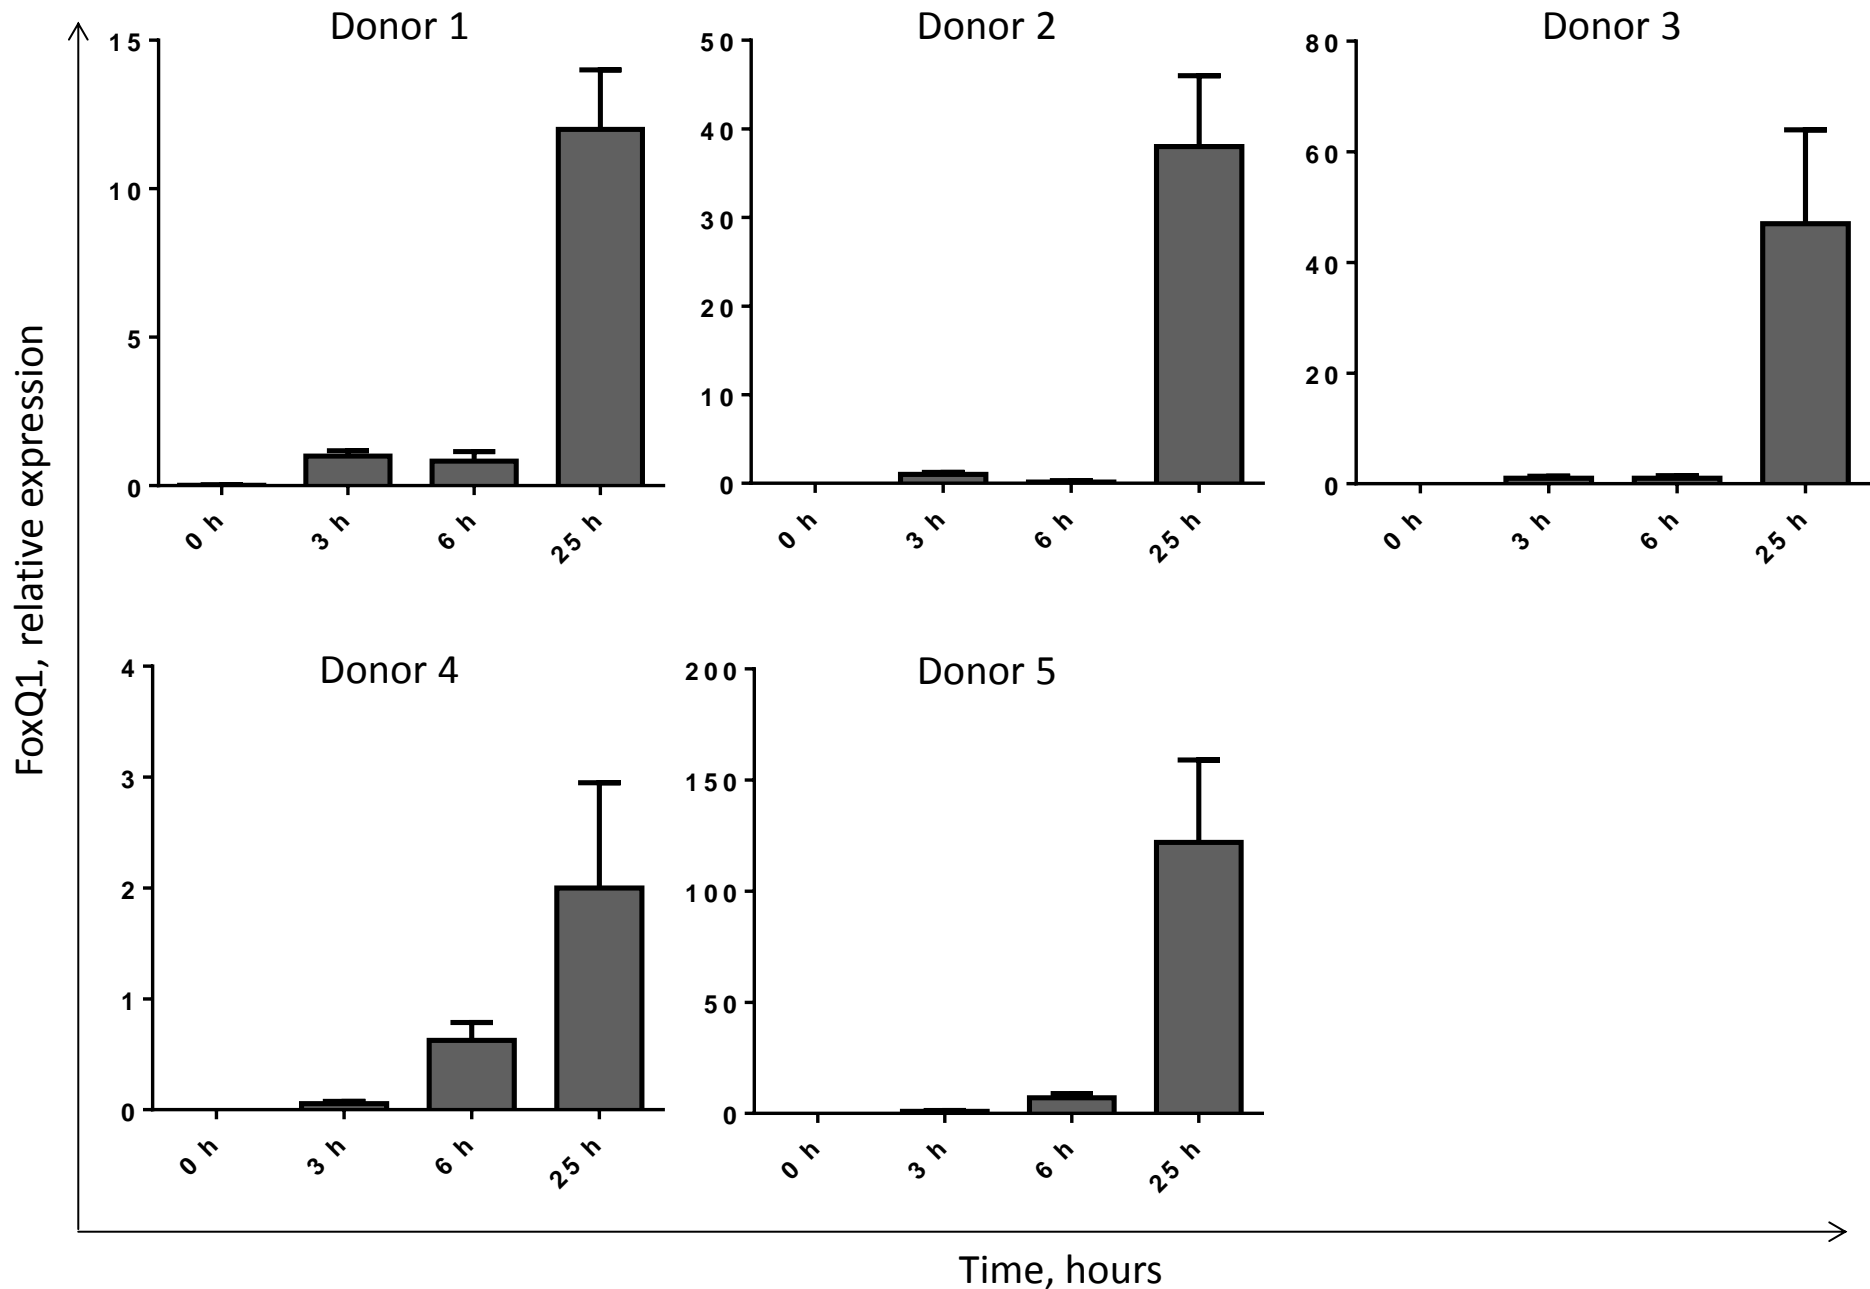

**Supplementary Figure 1. The dynamics of FoxQ1 expression in human monocytes after IL4 stimulation.** The monocytes of 5 healthy donors were stimulated with IL4 (10 ng/ml) and analyzed using qRT-PCR after 0h, 3h, 6h, and 25h after stimulation. The data are presented as mean $\pm$ SD of triplicates for individual donors.

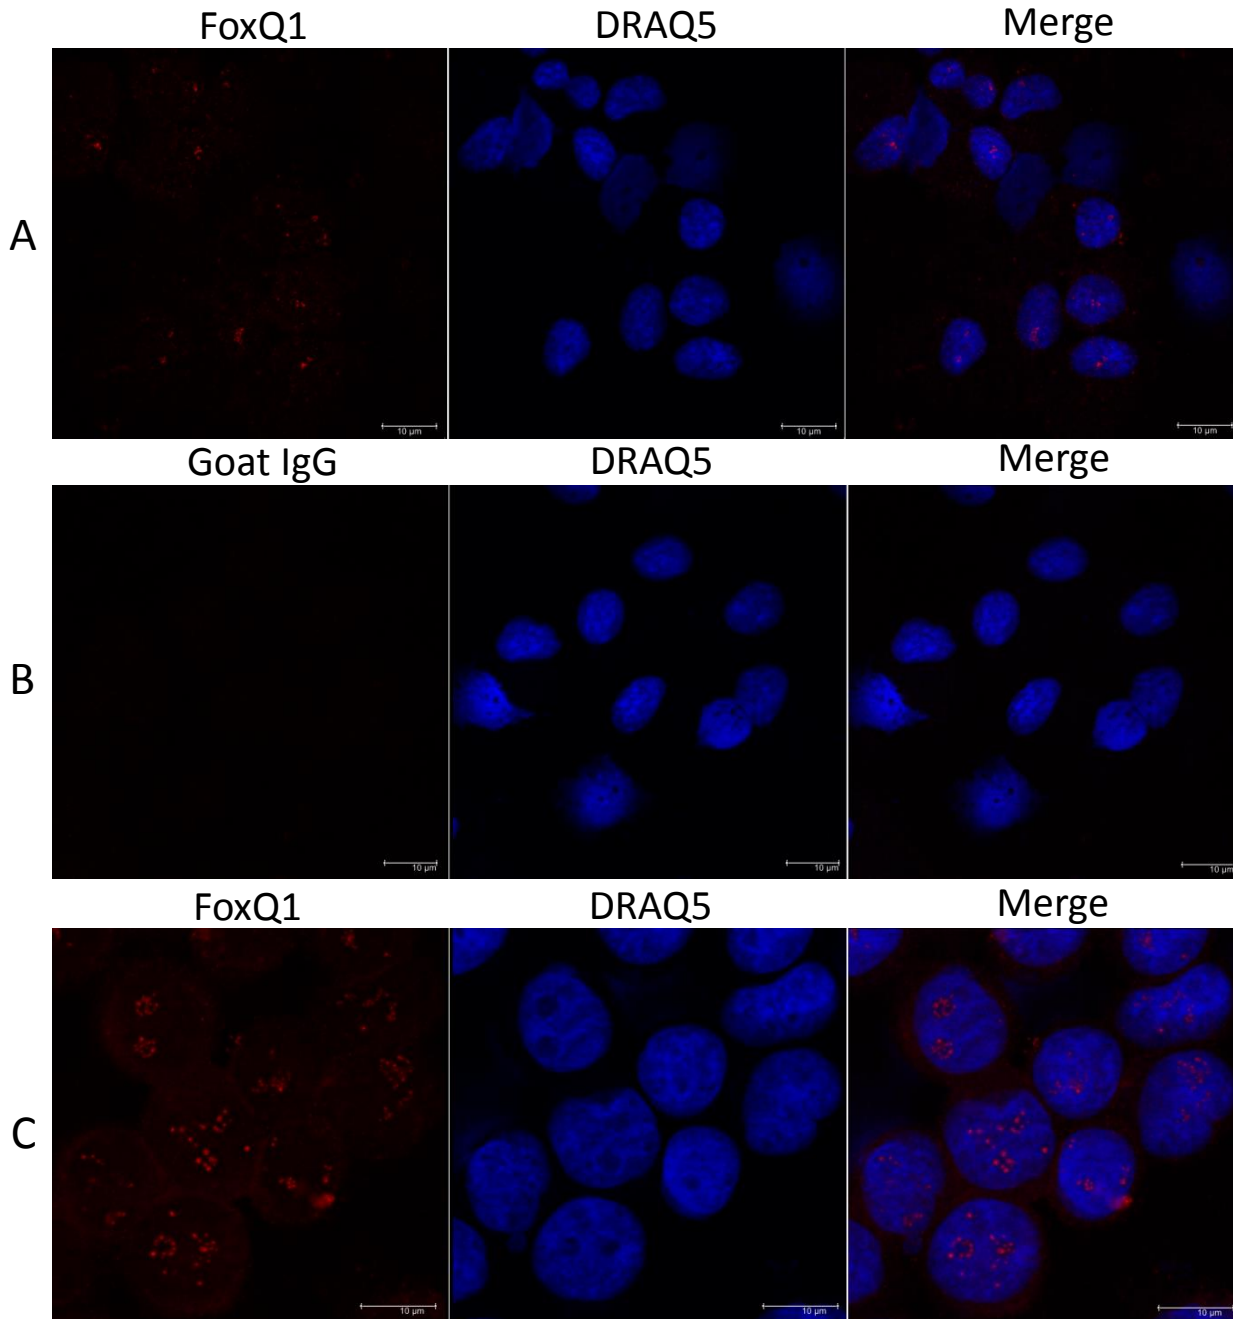

**Supplementary Figure 2. Expression of FoxQ1 protein in human macrophages and WIDR cancer cells.** Primary human monocyte-derived macrophages were stimulated with IL4 for 6 days and stained using goat anti-FoxQ1 abs (A) or goat IgG isotype control (B). WIDR human colorectal cancer cell line was stained using FoxQ1 abs and served as a positive control (C). Nuclei were visualized using DRAQ5. Scale bars: 10

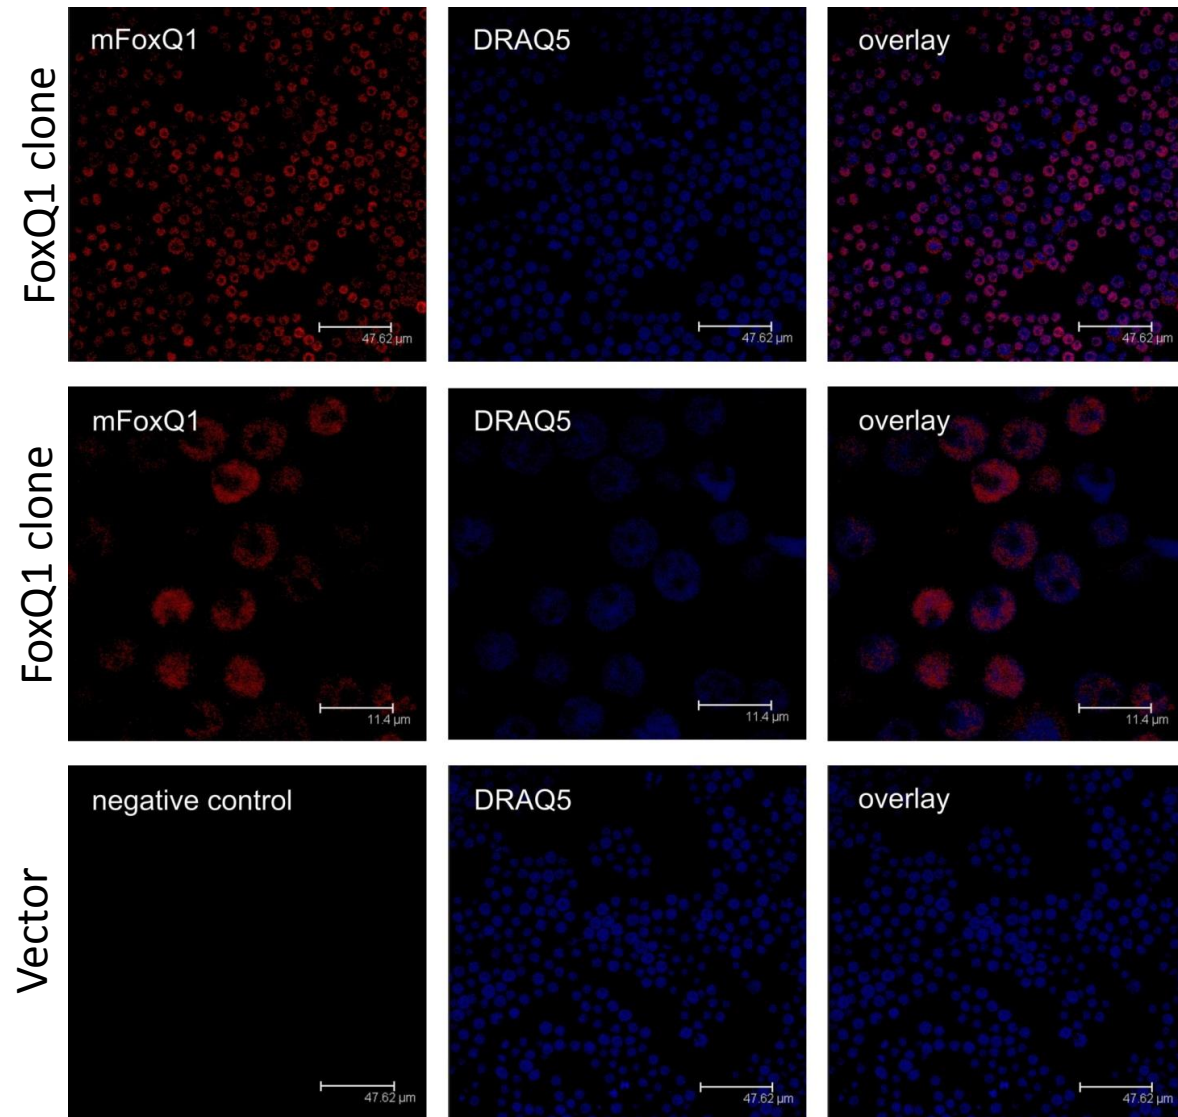

**Supplementary Figure 3. FoxQ1 expression in RAW 264.7 cells stably transfected with mouse FoxQ1 expression construct.** Cells were fixed with PFA and analyzed by IF/confocal microscopy (red: anti-V5/anti-mouse Cy3; blue: DRAQ5). Vector-transfected cells were used as a negative control

Supplementary Table 1. The list of differentially expressed (upregulated) genes responsible for cytoskeletal dynamics in RAW264.7-FoxQ1 clones.

| <b>Accession number</b> | <b>Gene Symbol</b> | <b>Gene Name</b>                              | <b>Diff. of Exp.</b> | <b>-log<sub>10</sub> (p-value)</b> |
|-------------------------|--------------------|-----------------------------------------------|----------------------|------------------------------------|
| NM_001166406            | Kif20a             | kinesin family member 20A                     | 2,82                 | 11,68                              |
| NM_024245               | Kif23              | kinesin family member 23                      | 2,07                 | 9,11                               |
| NM_145588               | Kif22              | kinesin family member 22                      | 2,04                 | 9,17                               |
| NM_008446               | Kif4               | kinesin family member 4                       | 1,71                 | 9,46                               |
| NM_010615               | Kif11              | kinesin family member 11                      | 1,65                 | 8,37                               |
| NM_197959               | Kif18b             | kinesin family member 18B                     | 1,60                 | 6,99                               |
| NM_134471               | Kif2c              | kinesin family member 2C                      | 1,43                 | 9,76                               |
| NM_183046               | Kif20b             | kinesin family member 20B                     | 1,30                 | 6,85                               |
| NM_139303               | Kif18a             | kinesin family member 18A                     | 1,06                 | 6,14                               |
| NM_028390               | Anln               | anillin, actin binding protein                | 1,50                 | 8,89                               |
| NM_133755               | Tubgcp2            | tubulin, gamma complex associated protein     | 1,62                 | 10,03                              |
| NM_134024               | Tubg1              | tubulin, gamma 1                              | 1,10                 | 6,57                               |
| NM_011655               | Tubb5              | tubulin, beta 5                               | 0,98                 | 6,07                               |
| NM_019756               | Tubd1              | tubulin, delta 1                              | 0,67                 | 6,48                               |
| NM_009446               | Tuba3a             | tubulin, alpha 3A                             | 0,66                 | 5,89                               |
| NM_001033484            | Iqgap3             | IQ motif containing GTPase activating protein | 1,69                 | 5,81                               |
| NM_001004140            | Ckap2              | cytoskeleton associated protein 2             | 1,28                 | 9,28                               |
| NM_001165989            | Ckap5              | cytoskeleton associated protein 5             | 1,14                 | 6,25                               |
| NM_181589               | Ckap2l             | cytoskeleton associated protein 2-like        | 1,11                 | 8,94                               |
| NM_019670               | Diap3              | diaphanous homolog 3 (Drosophila)             | 0,79                 | 6,93                               |
| NM_023142               | Arpc1b             | actin related protein 2/3 complex             | 0,68                 | 7,13                               |

Supplementary Table 2. The list of differentially expressed (downregulated) genes responsible for migration and metastasis in RAW264.7-FoxQ1 clones.

| <b>Accession number</b> | <b>Gene Symbol</b> | <b>Gene Name</b>                           | <b>Diff. of Exp.</b> | <b>-log10 (p-value)</b> |
|-------------------------|--------------------|--------------------------------------------|----------------------|-------------------------|
| NM_198862               | Nlgn2              | neuroligin 2                               | -0,52                | 7,29                    |
| NM_008397               | Itga6              | integrin alpha 6                           | -1,35                | 7,90                    |
| NM_010576               | Itga4              | integrin alpha 4                           | -1,69                | 6,34                    |
| NM_008206               | H2-Oa              | histocompatibility 2, O region alpha       | -0,90                | 5,95                    |
| NM_001167745            | Wasl               | Wiskott-Aldrich syndrome-like (human)      | -0,55                | 6,65                    |
| NM_009148               | Exoc4              | exocyst complex component 4                | -0,52                | 6,32                    |
| NM_001161746            | Tnfrsf12a          | tumor necrosis factor receptor superfamily | -0,68                | 5,59                    |
| NM_009427               | Tob1               | transducer of ErbB-2.1                     | -0,40                | 5,69                    |
| NM_001136071            | Lsp1               | lymphocyte specific 1                      | -2,06                | 6,47                    |
| NM_177725               | Lrrc8a             | leucine rich repeat containing 8A          | -0,42                | 6,74                    |
| NM_001136055            | Cd82               | CD82 antigen                               | -0,82                | 8,34                    |
| NM_021028               | Tk2                | thymidine kinase 2, mitochondrial          | -0,65                | 5,62                    |
| NM_018797               | Plxnc1             | plexin C1                                  | -0,86                | 7,85                    |
| NM_025622               | Lgals2             | lectin, galactose-binding, soluble 2       | -0,49                | 5,64                    |
| NM_008770               | Cldn11             | claudin 11                                 | -4,28                | 10,30                   |

Supplementary Table 3. List of oligonucleotides for RT-qPCR analysis

|    | <b>Gene name</b>  | <b>Primer sequence</b>                  |
|----|-------------------|-----------------------------------------|
| F  | murine FoxQ1      | caaggtgctgcgcgacc                       |
| R  | murine FoxQ1      | tgtgtccgggtgctgagg                      |
| Pr | murine FoxQ1      | ctactggatgctcaacccaacagcgaatacaccttcgcc |
| F  | human FoxQ1       | gatgcttactgtgccaaa                      |
| R  | human FoxQ1       | gccaaggagaccacagta                      |
| Pr | human FoxQ1       | tgcagcaacgggtacagc                      |
| F  | murine claudin 11 | atcctcatcctccaggctacg                   |
| R  | murine claudin 11 | gagaactgtcaacagcagcaag                  |
| F  | murine PLXNC1     | caagcgactgagcacaac                      |
| R  | murine PLXNC1     | cgtccccaagaacagaac                      |
| F  | murine LSP1       | tcaaagcgagagaccagaggagaaac              |
| R  | murine LSP1       | caacgggtgcttctaagccaaagg                |
| F  | human LSP1        | agacatgagcaagaaagcctctg                 |
| R  | human LSP1        | cctccacaagcaccttctatac                  |
| Pr | human LSP1        | tgctttaattgttgatgaggtcttgagcctcccttc    |
| F  | human PLXNC1      | tgfcgagaagacatcaggag                    |
| R  | human PLXNC1      | cccgttactatcacgttgc                     |
| Pr | human PLXNC1      | ccaaggagaacaaggggaacagaaccaa            |
| F  | murine GAPDH      | catccatgacaacttggcattgt                 |
| R  | murine GAPDH      | cagtcttctgggtggcagtga                   |
| Pr | murine GAPDH      | aaggactcatgaccacagtccatgcc              |
| F  | human GAPDH       | tccatgacaacttggatcgt                    |
| R  | human GAPDH       | cagtcttctgggtggcagtga                   |
| Pr | human GAPDH       | aaggactcatgaccacagtccatgcc              |
| F  | murine beta actin | tgctctccctcacgccatcc                    |
| R  | murine beta actin | cggaaccgctcgttccaatag                   |
